# Supplementary material for: A population-based study of 15,000 people on Knowledge and awareness of lung cancer symptoms and risk factors in Saudi Arabia
Source: Frontiers journal article supplement (doi:10.3389/fonc.2024.1295847), 2024-02-20
Supplement: Data_Sheet_1.pdf [file Data_Sheet_1.pdf]

## **A population-based study of 15,000 people on Knowledge and awareness of lung cancer symptoms and risk factors in Saudi Arabia**

**\*Corresponding author:** Dr. Jaber S. Alqahtani, Department of Respiratory Care, Prince Sultan Military College of Health Sciences, Dammam 34313, Saudi Arabia; [Alqahtani-Jaber@hotmail.com](mailto:Alqahtani-Jaber@hotmail.com)

### **Demographic Questions**

#### **First Section: -**

##### **1. What is your age?**

- 18 – 30
- 31 – 40
- 41 – 50
- 51 – 60
- >60

##### **2. What is your gender?**

- Male
- Female

##### **3. Which region are you from?**

- Eastern Region
- Western Region
- Central Region
- Northern Region
- Southern Region

##### **4. What is your marital status?**

- Single
- Married

##### **5. What is the highest level of education qualification you have obtained?**

- Elementary school
- Intermediate School
- High School
- Diploma
- Bachelor
- Master
- PhD

6. Are you currently:

- Employed
- Unemployed
- Retired

7. Have you, your family or friends had cancer?

|                     | Yes | No |
|---------------------|-----|----|
| You                 |     |    |
| Partner             |     |    |
| Close family member |     |    |
| Other family member |     |    |
| Friend              |     |    |

8. Do you smoke?

- Yes, nowadays
- Yes, in the past
- No

**The sub-questions related to Q8:**

How many packets you smoke per a day? (If The answer is *Yes, nowadays*)

How long have you been smoking? (If The answer is *Yes, nowadays*)

How many packets you used to smoke per a day?(If The answer is *Yes, in the past*)

How long were you smoking? (If The answer is *Yes, in the past*)

## Lung Cancer Awareness Measure

### Second Section: -

1. The following may or may not be warning signs for lung cancer. We are interested in your opinion:

| Items                                                                                                                   | Yes | No |
|-------------------------------------------------------------------------------------------------------------------------|-----|----|
| 1. Do you think that unexplained weight loss could be a sign of lung cancer?                                            |     |    |
| 2. Do you think that a persistent (3 weeks or longer) chest infection could be a sign of lung cancer?                   |     |    |
| 3. Do you think that a cough that does not go away for two or three weeks could be a sign of lung cancer?               |     |    |
| 4. Do you think that persistent shortness of breath could be a sign of lung cancer?                                     |     |    |
| 5. Do you think that persistent tiredness or lack of energy could be a sign of lung cancer?                             |     |    |
| 6. Do you think that persistent chest pain could be a sign of lung cancer?                                              |     |    |
| 7. Do you think that persistent shoulder pain could be a sign of lung cancer?                                           |     |    |
| 8. Do you think that coughing up blood could be a sign of lung cancer?                                                  |     |    |
| 9. Do you think that an ache or pain when breathing could be a sign of lung cancer?                                     |     |    |
| 10. Do you think that a painful cough could be a sign of lung cancer?                                                   |     |    |
| 11. Do you think that loss of appetite could be a sign of lung cancer?                                                  |     |    |
| 12. Do you think that changes in the shape of your fingers or nails could be a sign of lung cancer?                     |     |    |
| 13. Do you think that developing an unexplained loud, high pitched sound when breathing could be a sign of lung cancer? |     |    |
| 14. Do you think that worsening or change in an existing cough could be a sign of lung cancer?                          |     |    |

**Third Section: -**

3. The following may or may not increase a person's chance of developing lung cancer. How much do you agree that each of these can increase a person's chance of developing lung cancer?

|                                                                                                     | Strongly Agree | Agree | Not Sure | Disagree | Strongly Disagree |
|-----------------------------------------------------------------------------------------------------|----------------|-------|----------|----------|-------------------|
| 1. Exposure to radon gas (a naturally occurring radioactive gas)                                    |                |       |          |          |                   |
| 2. Exposure to another person's cigarette smoke                                                     |                |       |          |          |                   |
| 3. Having had treatment for any cancer in the past                                                  |                |       |          |          |                   |
| 4. Having a close relative with lung cancer                                                         |                |       |          |          |                   |
| 5. Exposure to chemicals (such as asbestos)                                                         |                |       |          |          |                   |
| 6. Having a previous history of cancer such as head and neck cancer                                 |                |       |          |          |                   |
| 7. Air pollution                                                                                    |                |       |          |          |                   |
| 8. Being a smoker                                                                                   |                |       |          |          |                   |
| 9. Having a previous history of lung disease, such as, Chronic Obstructive Pulmonary Disease (COPD) |                |       |          |          |                   |

**Fourth Section: -**

How confident are you that you would notice a symptom of lung cancer?

- Not confident at all
- Slightly confident
- Somewhat confident
- Fairly confident
- Completely confident
